# Supplementary material for: Lava flow hazard at Fogo Volcano, Cabo Verde, before and after the 2014–2015eruption
Source: Copernicus journal article supplement (doi:10.5194/nhess-16-1925-2016), 2016-08-17
Supplement: Supplementary file 1 [file nhess-16-1925-2016-supplement.zip]

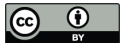

## *Supplement of*

# **Lava flow hazard at Fogo Volcano, Cabo Verde, before and after the 2014–2015 eruption**

**Nicole Richter et al.**

*Correspondence to:* Nicole Richter (nrichter@gfz-potsdam.de)

- nhess-16-1925-2016-supplement-title-page.pdf
- SupplementaryMaterial
  - Catchment.kmz
  - Fogo\_16Jan2015\_TLS\_SfM\_DEM.rar
  - HazardMap\_Fogo\_post.kmz
  - HazardMap\_Fogo\_pre.kmz
  - HazardMap\_Pico\_post.kmz
  - HazardMap\_Pico\_pre.kmz
  - Hillshade\_DEM\_Fogo\_post.kmz
  - Hillshade\_DEM\_Fogo\_pre.kmz
  - Hillshade\_TLS\_DEM.kmz
  - Thickness\_2014-2015\_lava\_flow.kmz

The copyright of individual parts of the supplement might differ from the CC-BY 3.0 licence.
